1 **Neuronal transcriptome analyses reveal novel neuropeptide modulators of excitation and**  
2 **inhibition imbalance in *C. elegans***

3 **Katherine A. McCulloch<sup>1</sup>, Kingston Zhou<sup>1</sup>, and Yishi Jin<sup>1\*</sup>**

4

5 <sup>1</sup> Section of Neurobiology

6 Division of Biological Sciences

7 University of California San Diego

8 La Jolla, California 92093

9 \*corresponding author [yijin@ucsd.edu](mailto:yijin@ucsd.edu)

10 **Running title: Neuropeptide Modulation of Excitation and Inhibition imbalance**

11 **Keywords: *ins-29*, Insulin-like peptide, *acr-2*, *ets-5*, *flp-12*, RNA-seq, cholinergic excitation,**  
12 **locomotion**

13 **Five Figures, seven tables**

14

15

16

17

18

19

20

21

22 **ABSTRACT**

23 Neuropeptides are secreted molecules that have conserved roles modulating many processes,  
24 including mood, reproduction, and feeding. Dysregulation of neuropeptide signaling is also implicated  
25 in neurological disorders such as epilepsy. However, much is unknown about the mechanisms  
26 regulating specific neuropeptides to mediate behavior. Here, we report that the expression levels of  
27 dozens of neuropeptides are up-regulated in response to circuit activity imbalance in *C. elegans*. *acr-2*  
28 encodes a homolog of human nicotinic receptors, and functions in the cholinergic motoneurons. A  
29 hyperactive mutation, *acr-2(gf)*, causes an activity imbalance in the motor circuit. We performed cell-  
30 type specific transcriptomic analysis and identified genes differentially expressed in *acr-2(gf)*, compared  
31 to wild type. The most over-represented class of genes are neuropeptides, with insulin-like-peptides  
32 (ILPs) the most affected. Moreover, up-regulation of neuropeptides occurs in motoneurons, as well as  
33 sensory neurons. In particular, the induced expression of the ILP *ins-29* occurs in the BAG neurons,  
34 which are previously shown to function in gas-sensing. We also show that this up-regulation of *ins-29* in  
35 *acr-2(gf)* animals is activity-dependent. Our genetic and molecular analyses support cooperative  
36 effects for ILPs and other neuropeptides in promoting motor circuit activity in the *acr-2(gf)* background.  
37 Together, this data reveals that a major transcriptional response to motor circuit dysregulation is in up-  
38 regulation of multiple neuropeptides, and suggests that BAG sensory neurons can respond to intrinsic  
39 activity states to feedback on the motor circuit.

40

41

42

43

44

45

46

47 **AUTHOR SUMMARY**

48 Neuropeptides are secreted small molecules that regulate a variety of neuronal functions and are also  
49 implicated in many diseases. However, it remains poorly understood how expression of neuropeptides  
50 is regulated, particularly in disease states. Using a genetic animal model that mimics epilepsy, we  
51 identified dozens of neuropeptides that are up-regulated when neuronal activities are altered. Some of  
52 these neuropeptides share similarity to insulin-like properties (ILPs). Strikingly, one of these ILPs is  
53 expressed in sensory neurons that normally respond to acute carbon dioxide exposure. We show that  
54 the mis-regulation of this ILP expression is activity-dependent. Moreover, these neuropeptides act in  
55 concert to modulate animal behaviors. The findings in this study provide further evidence that  
56 neuropeptides are key mediators of aberrant cholinergic signaling, and suggest complex neural network  
57 effects from sensory neurons onto motor function.

58

59

60

61

62

63

64

65

66

67

68

69

## 70 INTRODUCTION

71 Neural circuits are dynamic, changing their properties in response to experience. These  
72 changes are critical for maintaining circuit homeostasis and in processes like memory. Many factors  
73 such as c-Fos and BDNF, are activated early in response to increased neural activity and further  
74 regulate the expression of downstream genes [1]. These early-acting genes are also involved in many  
75 neurological diseases. For example, mutations in the activity-dependent transcriptional repressor gene  
76 *Mecp2* are associated with Rett's syndrome [2]. *Mecp2* is necessary for the transcriptional up-  
77 regulation of BDNF, a key early-acting gene regulating synaptic plasticity [3].

78 Neuropeptides are small, secreted molecules that play neuro-modulatory roles in all animals.  
79 Neuropeptides have an extraordinarily diverse set of functions, including in feeding, mood, and  
80 reproduction, among others. Secreted neuropeptides bind to G-protein coupled receptors (GPCRs) on  
81 target cells to modulate neuronal activity. Neuropeptides can act on cells post-synaptic to where they  
82 are secreted from, but can also act over long distances. Neuropeptide expression can be changed by  
83 experience, for example, the expression of Neuropeptide Y (NPY) changes in response to a myriad of  
84 stressors. NPY can inhibit anxiety in multiple stress models [4], and may also play a role in neurological  
85 diseases, such as epilepsy [5]. Although multiple neuropeptides have been implicated in diseases,  
86 much remains unknown about how they are regulated [5,6].

87 The nematode *C. elegans* has long been an important experimental model for investigating the  
88 regulation of neuronal circuits. The well-defined connectomics of its nervous system, in combination  
89 with powerful genetics and molecular tools, enable *in vivo* dissection of neural circuit regulation with  
90 high resolution. *C. elegans* locomotion is controlled through the balanced activities of cholinergic  
91 excitatory neurons and GABAergic inhibitory neurons to promote contraction and relaxation of body-  
92 wall muscle, respectively. The locomotor circuit has been used to identify multiple conserved genes that  
93 regulate synaptic transmission. The gene *acr-2* encodes a neuronal acetylcholine receptor subunit that  
94 is expressed in cholinergic motor neurons. A Valine-to-Methionine transition mutation causes a gain-of-  
95 function in *acr-2* [*acr-2(gf)*] that results in a hyperactive channel [7]. The mutation affects a highly

96 conserved residue within the pore-lining TM2 domain, and similar mutations in the human CHRN2  
97 cholinergic receptor subunit are associated with Autosomal Dominant Frontal Lobe Epilepsy (ADFLE)  
98 [8]. *acr-2(gf)* worms show defective movement as well as spontaneous whole-body shrinking, or  
99 convulsion.

100 Over 100 neuropeptide genes have been identified in *C. elegans*. These genes produce  
101 neuropeptides that fall into three classes: FMRFamide-like peptides (FLP), neuropeptide-like proteins  
102 (NLP) and insulin-like peptides (ILP) [9]. As with neuropeptides in humans, each neuropeptide gene  
103 produces a pro-neuropeptide, that is subjected to several enzymatic processing steps. The *flp* and *nlp*  
104 genes can generate several neuropeptides from a single locus through enzymatic cleavage by the pro-  
105 protein convertase *egl-3* and the endopeptidase *egl-21* [10,11]. Similar to human insulin and insulin-like  
106 growth factors, the *ins* loci produce a single peptide, that is activated from the pro-insulin peptide  
107 through the enzymatic activity of *egl-3* and a related pro-protein convertase *kpc-1* [12].

108 Previous work has shown that the neuropeptides *flp-18* and *flp-1* are important for regulating  
109 neurotransmission in *acr-2(gf)* mutants [13]. Additionally, *flp-18* expression was up-regulated in  
110 cholinergic motoneurons to inhibit convulsion of *acr-2(gf)* animals in a homeostatic manner. However,  
111 loss of function in the gene *unc-31/CAPS*, which is required for neuropeptide secretion, suppressed  
112 *acr-2(gf)* convulsion, suggesting that other neuropeptides function to promote circuit hyperactivity.  
113 Using a cell-type specific transcriptomic approach, we identified over 200 genes whose expression was  
114 significantly altered in *acr-2(gf)* neurons compared to wild type. Among them, genes involved in  
115 neuropeptide signaling were significantly over-represented in this gene list. One of these, *ins-29*, has  
116 not been previously characterized. Expression reporters for *ins-29* are weakly or not expressed in BAG  
117 gas-sensing neurons in wild type, and *ins-29* expression is clearly increased in *acr-2(gf)* animals. The  
118 increased *ins-29* expression in BAG neurons of *acr-2(gf)* adults is activity-dependent and requires the  
119 transcription factor *ets-5*, which has been shown previously to act embryonically to make BAG  
120 functionally competent [14]. Although BAG neurons interact with the motor circuit to respond to  
121 environmental cues, our data indicates that intrinsic activity states modulate expression of genes in the

122 sensory BAG neuron, which then feed-back on the motor circuit. Finally, we present functional  
123 evidence supporting that the concerted action of several neuropeptides underlies motor circuit  
124 hyperactivity.

125

## 126 RESULTS

### 127 Expression profiling of adult cholinergic neurons

128 We performed cell-type specific RNA-seq analyses, using the *Pacr-2::gfp* reporter *juls14* to  
129 isolate GFP expressing neuronal cells by FACS followed by RNA-seq (Materials and Methods, Table  
130 S1) [7,15,16,17]. Besides expression in cholinergic motoneurons (VA, VB, DA, and DB), GFP  
131 expressed from *juls14* is also present in several unidentified neurons in the head and tail [7]. RNA-seq  
132 data from isolated wild-type neurons was analyzed with the Cufflinks program to identify expressed  
133 genes (Materials and Methods, Table S2). The gene list for the wild type cholinergic motor neurons was  
134 compared with a recent study that profiled major tissue-types in adult *C. elegans* [18]. We found that  
135 almost all of the genes identified in our dataset (~95%) were also detected in a pan-neuronal analyses  
136 of expressed genes (Figure 1A), but shared very little overlap with tissue-specific expression profiles  
137 identifying enriched transcripts in hypodermis and muscle (Figure 1A). This comparison suggests our  
138 sample were relatively free of contamination from surrounding tissue. We also compared our data to  
139 previous analysis of a subset of cholinergic motoneurons (VA and DA) labeled with *Punc-4::gfp* [19].  
140 Although the cell-types analyzed in these studies are not identical (A-type only), and they were  
141 performed at different life stages (larval vs. young adult in this study) using different techniques  
142 (microarray vs. RNA-seq in this study), over half of the genes (~75%) from our dataset were also  
143 identified by microarray in larval type A motoneurons (Figure 1B). These include core cholinergic genes  
144 such as *unc-17/VACHT* (Avg. FPKM=484.1) and pan-neuronal genes such as *unc-13* (Avg.  
145 FPKM=90.9), required for synaptic vesicle priming [20,21]. Additionally, both of these datasets were  
146 relatively free of GABA specific transcripts. Thus, this comparison shows the genes identified in our

147 sample are highly enriched for those that are validated to be expressed and function in cholinergic  
148 neurons.

### 149 **Differential expression analyses between wild-type and *acr-2(gf)* neurons**

150 We are interested in the genes differentially expressed in response to altered neuronal activity.  
151 The cholinergic neuron transcriptome in adult *acr-2(gf)* mutants was compared to those from wild type  
152 animals for changes in gene expression using DESeq2, and this analysis identified 234 genes as  
153 significantly mis-expressed in the *acr-2(gf)* mutant (Table S2) [22,23]. We found *flp-18* to be  
154 significantly up-regulated in *acr-2(gf)*, as predicated from our previous studies [13]. Analysis of the  
155 distribution of the fold change data using a histogram showed that a majority of the changes were up-  
156 regulation, at around 2-fold (Figure 1C). GO-term analyses indicated that genes involved in  
157 neuropeptide signaling were highly enriched in our gene list (Figure 1D) [24]. In total, the expression of  
158 21 neuropeptide genes are identified as significantly up-regulated in *acr-2(gf)* neurons, representing  
159 approximately 18% of the estimated 113 neuropeptide genes identified in *C. elegans* (Figure 2A) [9].  
160 Of these, several insulin-like peptides (ILP) were the most up-regulated (Figure 2A, Table S2). In  
161 addition, none of these ILP genes are detected as expressed in wild type cholinergic samples (Table  
162 S2). Together, these data indicate that the major response to altered motor circuit activity at the  
163 transcriptional level is to increase neuropeptide gene expression.

164 To validate the RNA-seq analyses, we analyzed transcription reporters for the most up-  
165 regulated neuropeptide gene of each class. *flp-12* and *nlp-1* were the most up-regulated neuropeptides  
166 of their respective classes. These genes have been implicated in context-dependent behaviors. *flp-12*  
167 is involved in male locomotion, and *nlp-1* functions in food-evoked turning behaviors [25,26]. 2kb  
168 upstream of *flp-12* and *nlp-1* was used to generate GFP reporters, and both reporters showed  
169 expression in neurons in the head, similar to published studies of these neuropeptides (Figure 2B-E)  
170 [27,28]. In *acr-2(gf)*, the *flp-12* reporter showed a different expression pattern than wild type, with  
171 ectopic expression in a pair of neurons close to the ganglion (Figure 2B, D). Similarly, the *nlp-1* reporter  
172 was up-regulated and expressed in additional cells in *acr-2(gf)* animals compared to wild type (Figure

173 2C, E). Therefore, this analysis provides an explanation for the increased RNA levels detected in RNA-  
174 seq of *acr-2(gf)*, and also shows that increased locomotor excitation may cause mis-expression of  
175 these neuropeptide genes.

### 176 ***acr-2(gf)* increases expression of *ins-29* and *acr-2* in BAG sensory neurons**

177 Among all up-regulated neuropeptides, *ins-25* and *ins-29* showed the most dramatic increase  
178 (Figure 2A). As the expression pattern and function of these ILPs is unknown, we investigated their  
179 expression patterns in further detail. *ins-25* and *ins-29* are within a less than 2.5kb region on  
180 Chromosome I, with *ins-29* being upstream of *ins-25*, in an operon, separated by 697bp intergenic  
181 sequence (Materials and Methods, Figure 3A). We used 2kb of sequence upstream of *ins-29* to drive  
182 GFP expression. In wild type animals, the *ins-29* reporter was sometimes weakly expressed in two  
183 neurons in the head, but often expressed in just one neuron or no GFP expression was detected  
184 (Figure 3B). However, in *acr-2(gf)* animals, consistent strong expression of GFP was observed in the  
185 same two head neurons (Figure 3C). These neurons are likely sensory, as they extend dendrites out to  
186 the nose of the animal.

187 We next confirmed that the *ins-29* expression construct was expressed in cells labeled by *Pacr-*  
188 *2::gfp* (Figure 3B-E). We constructed an *ins-29* expression construct containing the endogenous *ins-29*  
189 trans-spliced to mKate2. The *Pins-29::ins-29::SL2::mKate2* expression pattern was similar to *Pins-*  
190 *29::gfp* (Figure 3D,E). We then generated strains co-expressing *Pins-29::ins-29::SL2::mKate2* and  
191 *Pacr-2::gfp*. In wild-type, *Pacr-2::gfp* was expressed in several unidentified neurons in the head, in  
192 addition to its reported expression in cholinergic motoneurons [7]. No co-localization was observed  
193 between *Pacr-2::gfp* and the *Pins-29::ins-29::SL2::mKate2* in wild type animals that did express the *ins-*  
194 *29* reporter (Figure 3D-F). However, the *ins-29* expression construct showed co-localization with *Pacr-*  
195 *2::gfp* in *acr-2(gf)* animals (Figure 3G-I). This result suggests that, although total mRNA levels of *acr-2*  
196 in neurons are not significantly affected by the *acr-2(gf)* mutation, there is increased expression of *acr-2*  
197 in some head neurons.



198 The dendrite morphology and cell position of cells expressing *ins-29* suggested that they were  
199 likely to be the BAG neurons, which are known for their role in gas-sensing, particularly CO<sub>2</sub> avoidance  
200 (Figure 3C) [29,30,31]. To confirm that the cells expressing *ins-29* were indeed BAG neurons, we  
201 generated animals co-expressing *Pins-29::ins-29::SL2::mKate* extrachromosomal arrays and an  
202 integrated GFP marker for BAG [*Pgcy-33::gfp*] and looked for co-localization (Figure 4A-F). We  
203 compared the expression of this construct to *Pgcy-33::gfp*, and, particularly in the *acr-2(gf)* background,  
204 where the *ins-29* reporter expression is consistently detected, the two expression patterns completely  
205 overlapped (Figure 4D-F). For those wild type animals that expressed the *ins-29* reporter, this  
206 expression also overlapped with the BAG marker (Figure 4A-C).

207 The transcription factor *ets-5* is required for BAG development and function [14]. To determine if  
208 *ets-5* is involved in the expression of *ins-29* in *acr-2(gf)*, an *ets-5(0) acr-2(gf)* double mutant strain with  
209 the *Pins-29::gfp* was generated. Penetrance of expression was quantified by scoring for presence of  
210 GFP expression in zero, one, or both BAG neurons (Figure 3G). Very few wild-type animals express  
211 the transgene in both BAG neurons (31%), while most *acr-2(gf)* animals (90%) do. We found a marked  
212 decrease in the expression of the *ins-29* reporter in *acr-2(gf)* animals that lacked *ets-5* function, and  
213 these animals were more similar to wild type. Altogether, these data indicate that *ins-29* is up-regulated  
214 in sensory BAG neurons in an *ets-5*-dependent manner in response to *acr-2(gf)*.

### 215 **Reduction in circuit hyperactivity in *acr-2(gf)* animals restores *Pins-29::gfp* expression to wild** 216 **type patterns**

217 To further address whether the up-regulation of *Pins-29::gfp* in response to *acr-2(gf)* is  
218 dependent on neuronal activity, we next tested if reduction in motor circuit hyperactivity could restore  
219 expression of *ins-29* to wild type. The TRPM channel *gtl-2* is expressed in the hypodermis and  
220 regulates systemic ion homeostasis [32]. Mutation of this non-neuronal gene almost completely  
221 suppresses *acr-2(gf)* convulsion and locomotion phenotypes. The *ins-29* transcriptional *gfp* reporter  
222 was crossed into *gtl-2* null mutants in either a wild type or *acr-2(gf)* backgrounds. Animals were scored  
223 for GFP expression in zero, one, or both neurons (Figure 4H). *gtl-2(0)* animals alone resembled wild

224 type. The expression pattern of *Pins-29::gfp* in *gtl-2(0); acr-2(gf)* animals also resembled wild type  
225 rather than *acr-2(gf)* alone. This result supports the idea that the changes in neuropeptide expression  
226 are likely due to systemic motor activity.

### 227 **Insulin-like peptides and *flp-12* coordinately promote motor circuit activity**

228 Next, we addressed whether these neuropeptides expressed from head neurons affect motor  
229 circuit function. Genetic null [designated as (0)] mutations were used to determine if candidate up-  
230 regulated neuropeptides had functional roles in the *acr-2(gf)* motor circuit (see Materials and Methods).  
231 We focused on the most up-regulated neuropeptide genes of each class. Single loss of function  
232 mutations of *ins-25*, *ins-29*, *flp-12*, or *nlp-1* did not significantly affect convulsion rate (Figure 5A, S1).  
233 Additionally, a deletion mutation encompassing both *ins-29* and *ins-25* generated by CRISPR also did  
234 not significantly affect convulsion rate (Figure 3A, S1). However, a slight decrease in convulsion rate  
235 was observed in *flp-12(0) acr-2(gf)* animals (Figure 5A). Therefore, we made several combinations  
236 between *flp-12(0) acr-2(gf)* animals and deletion mutations in *ins-29 ins-25* and *flp-24*, the second most  
237 up-regulated *flp*-peptide gene. Analysis of convulsion rates in these strains showed that deletion of *flp*-  
238 12 with either *flp-24* or *ins-29 ins-25* resulted in a significant decrease in convulsion rate compared to  
239 *acr-2(gf)* alone. This analysis suggests that these neuropeptides act to promote circuit hyperactivity.

240 We also sought to restore convulsion frequency in *ins-29(0) ins-25(0); flp-12 (0) acr-2(gf)*  
241 compound mutants by over-expressing wild type *ins-29* or *flp-12* in *ins-29 ins-25(0); flp-12(0) acr-2(gf)*  
242 mutant animals. Interestingly, over-expression of either *ins-29* or *flp-12* alone also partially suppressed  
243 convulsion frequency of *acr-2(gf)*, and the phenotype was similar in the neuropeptide compound mutant  
244 background (Figure 5B). Therefore, over-expression of either *ins-29* or *flp-12* acts in a dominant-  
245 negative manner to suppress *acr-2(gf)*. One possibility is that over-expression of these peptides blocks  
246 wild type function of their downstream receptor(s).

247 We further asked whether these neuropeptide genes affected synaptic transmission in the  
248 locomotor circuit using pharmacological assays. Aldicarb is an acetylcholinesterase inhibitor which  
249 leads to buildup of acetylcholine at the synaptic cleft and eventual paralysis in wild type animals [33].

250 Mutants that increase or decrease cholinergic activity display increased or decreased sensitivity to  
251 aldicarb. *acr-2(gf)* animals are more sensitive to aldicarb, consistent with their hyperactivity as  
252 described by previous electrophysiology and pharmacology analysis [7]. *ins-29(0) ins-25(0); flp-12(0)*  
253 *acr-2(gf)* animals were similar to *acr-2(gf)* alone on aldicarb, indicating that overall neurotransmission  
254 was not strongly affected by these mutations (Figure 5C, Table S3). *ins-29(0) ins-25(0); flp-12(0)*  
255 mutants were also not significantly different from wild type animals on aldicarb (Table S4). Levamisole  
256 is an agonist for the post-synaptic cholinergic receptors on muscle [34,35]. Resistance or sensitivity to  
257 levamisole can represent changes in muscle responsiveness. In these experiments, we found that *ins-*  
258 *29 ins-25(0); flp-12(0) acr-2(gf)* animals were less sensitive to levamisole than *acr-2(gf)* alone (Figure  
259 5D, Table S5). However, no effect was observed in these compound neuropeptide mutants outside of  
260 the *acr-2(gf)* background (Table S6). This result indicates that these neuropeptides may function post-  
261 synaptically to affect motor circuit function, and this function is only observed in the *acr-2(gf)*  
262 background, consistent with these peptides being differentially expressed in response to *acr-2(gf)*  
263 hyperactivity. Together, these data show that insulin-like peptides and *flp-12* act together to promote  
264 *acr-2(gf)* circuit hyper-activity, at least partially by modulating post-synaptic function.

265

## 266 DISCUSSION

267 Using neuronal-type specific RNA-seq, we identified over 200 genes whose expression levels  
268 are altered in response to cholinergic hyperactivity in the motor circuit of *C. elegans*. Genes encoding  
269 neuropeptides were over-represented in this list, and we validated that fluorescent reporters for *ins-29*,  
270 *flp-12*, and *nlp-1* were over- and/or ectopically-expressed in *acr-2(gf)* animals compared to wild type.  
271 These data support the conclusion that the major transcriptional response to cholinergic hyperactivity in  
272 *C. elegans* is by altering neuropeptide gene expression. Bioinformatic analyses of upstream sequences  
273 did not identify common motifs in the promoter regions of these neuropeptides, suggesting that  
274 multiple transcriptional pathways may be involved in these changes. Indeed, the fluorescent reporters

275 analyzed here showed diverse expression patterns as well as varied changes in expression, from over-  
276 expression in the same cells as wild type, to ectopic expression patterns.

277 Insulin-like peptides were the most up-regulated genes identified by RNA-seq in *acr-2(gf)*. The  
278 expression and function of one of these, *ins-29*, has not been previously characterized. Examination of  
279 *ins-29* transcriptional reporters showed expression in the gas-sensing BAG neurons, with increased  
280 intensity and more penetrant expression in both neurons detected in *acr-2(gf)* compared to wild type.  
281 Furthermore, co-labeling also showed up-regulation of *acr-2* itself in these neurons. BAG neurons are  
282 necessary for *C. elegans* to respond to changes in environmental CO<sub>2</sub> [29]. The observation that *ins-29*  
283 is expressed in the BAG sensory neurons, rather than motoneurons or pre-motor interneurons, was  
284 surprising. For example, whereas *flp-18* is expressed from the cholinergic motoneurons to affect *acr-*  
285 *2(gf)* activity and motor function, *ins-29* expression is increased in sensory neurons in the head.  
286 Together, these results indicate that genes involved in cholinergic neurotransmission including the *acr-*  
287 *2* cholinergic receptor subunit gene, as well as the insulin-like peptide gene *ins-29* are up-regulated in  
288 BAG neurons in the *acr-2(gf)* background. Neuropeptide signaling from BAG has been shown  
289 previously to interact with another cholinergic circuit, the egg-laying circuit [36]. *flp-17* and *flp-10*  
290 secreted from BAG act in parallel with cholinergic signaling to inhibit egg-laying. It is proposed that  
291 signaling from BAG integrates favorable environmental signals with the egg-laying circuit.

292 The BAG-specific transcription factor *ets-5* also regulates *Pins-29::gfp* expression. Analysis of  
293 the *ins-29* promoter did not reveal a clear *ets-5* binding site, and it is possible this effect is indirect. *ets-5-*  
294 dependent pathways, therefore, are necessary for the increased expression of *Pins-29::gfp* in response  
295 to *acr-2(gf)*. This result also indicates a function for *ets-5* beyond development and maintenance of  
296 BAG neuron identity, but in modifying transcription in the BAG neurons under different physiological  
297 conditions in mature animals. Finally, loss of function or over-expression of ILP genes, along with *flp-*  
298 *12*, can suppress *acr-2(gf)* convulsion. Therefore, levels of multiple neuropeptides, such as the ILP  
299 INS-29 from BAG, can affect activity balances in the *C. elegans* motor circuit.

300 In humans, seizure is a common co-morbidity of diabetes. *In vitro* analysis has also found, for  
301 example, that IGF signaling can be neuroprotective in response to injury, but can also promote  
302 epileptogenesis[37]. Insulin peptide signaling may also play a role in Alzheimer's Disease (AD) [6].  
303 Although the role for insulin signaling in the brain is still unclear, levels of insulin and insulin receptors  
304 are markedly decreased in the brains of AD patients. Our data show that in *C. elegans*, ILP signaling is  
305 altered by aberrant cholinergic activity to modulate circuit function.

306

## 307 MATERIALS & METHODS

### 308 *C. elegans* genetics

309 *C. elegans* strains were maintained at 20-22°C. For RNA-seq experiments, CZ631(*juIs14[Pacr-*  
310 *2::gfp]*) and CZ5808 (*juIs14[Pacr-2::gfp]; acr-2(n2420)*) were used. For a list of all strains, see Table S1.  
311 All genetic null alleles are designated by (0) in the text.

312 CRISPR mutagenesis was performed as described previously, via co-CRISPR with *dpy-10*  
313 marker [38]. Two sgRNAs were designed to bind outside the *ins-29* and *ins-25* region [ *ins-29*  
314 TTGGCGCCCAGCGCCGTTGT GGG, *ins-25* CAGATCTTCGATTGGGACGG CGG]. To make the *ins-29*  
315 single deletion, the 5' *ins-29* sgRNA was injected. This generated a 568bp deletion spanning the entire  
316 first exon of *ins-29* (*ju1776*). Both sgRNAs were injected into wild-type or *ins-27(ok2474)* animals to  
317 delete both *ins-29* and *ins-25* and make an *ins-29 ins-25(0)* double mutant (*ju1580*) or *ins-29 ins-25(0)*  
318 *ins-27(0)* triple mutant chromosome (*ju1596 ok2474*). A ~2.2kb mutation was isolated in each  
319 background and both alleles were crossed into *acr-2(gf)*. Most crosses (except those described below)  
320 were done using standard methods. See Table S7 for genotyping primers.

321 Construction of double mutant strains with *flp-12(ok2309)* or *ets-5(tm866)* with *acr-2(gf)* was  
322 made using MT6448 *lon-2(e678) acr-2(gf)* strain. *flp-12* (X:-7.20) and *ets-5* (X:-6.20) are to the left of  
323 *acr-2* (X:-2.56) on the X chromosome. We generated heterozygotes of the genotype: *lon-2(e678) acr-*

324 *2(gf) X/[flp-12(ok2309) or ets-5(tm866)] X*. Non-long, convulsing progeny were isolated from the next  
325 generation and genotyped for the gene of interest.

### 326 **Sample preparation for RNA-seq**

327 Samples were prepared for dissociation and FACS essentially as described [15,39]. Animals  
328 were synchronized by hypochlorite treatment. Eggs were isolated from wild type N2, CZ631, and  
329 CZ5808 gravid adults and allowed to hatch overnight and arrest at the L1-stage. Synchronized L1s  
330 were plated onto 15cm NGM plates seeded with OP50 bacteria. Approximately 8-10,000 L1s were  
331 plated to 15-20 plates for each strain. As N2 cells are only needed to control for the FACS sort, only 5  
332 plates were prepared. These plates were incubated at 20°C for 72hr to reach adulthood prior to  
333 collection.

334 The entire process of cell preparation and sort was completed in a single day. Animals were  
335 washed off plates and spun down and the washed in M9 media to remove bacteria. Typically, pellets for  
336 each strain would be ~500µl in volume, and these would be split into two tubes. 750µl of lysis buffer  
337 (200µM DTT, 0.25% SDS, 20mM HEPES pH8.0, 3% sucrose) was added to each tube and samples  
338 were incubated for approximately 6-7 minutes. Worms were then rapidly washed in M9 five times. Next,  
339 500µl of 20mg/ml freshly made pronase solution was added. Samples were incubated in pronase  
340 approximately 20 minutes. Every 2-3 minutes, each sample was disrupted by pipetting with a P200, and  
341 samples were monitored for dissociation with a dissection microscope. When large worm chunks were  
342 no longer visible under the dissection microscope, the reaction was stopped by adding 250µl ice cold  
343 PBS-FBS solution (1X PBS solution with 2% Fetal Bovine Serum). Samples were then centrifuged in  
344 the cold at top speed in a microcentrifuge for 10 minutes, and pelleted cells were resuspended in 500µl  
345 FBS. Cells were then syringe-filtered (5µm pore). Samples were spun again in the cold and  
346 resuspended in ½ the starting volume of FBS. 80,000-100,000 GFP+ cells were collected for each  
347 sample at the UCSD Flow Cytometric Core in Moore's Cancer Center. Cells were sorted directly into  
348 Trizol LS and stored at -80°C until preparation. RNA was isolated using Qiagen RNAeasy kit.

349

## 350 **RNA-seq analyses**

351 RNA library preparation and sequencing were performed at the Institute for Genomic Medicine  
352 at UCSD. RNA libraries were prepared with Illumina TruSeq kit. Libraries were sequenced on an  
353 Illumina HiSeq4000. Data analyses were performed using the Galaxy platform [23]. We obtained 50-70  
354 million single-end reads/sample. Reads for each sample were mapped and aligned using TopHat [40].  
355 Identification of expressed genes in wild type was determined using Cufflinks. “Expressed” genes were  
356 selected by filtering for genes with an FPKM >10 in both replicates. This analysis produced 1,812  
357 transcripts (Table S2). Using the BioVenn site, our list of “expressed genes” from wild type neurons  
358 was compared with those identified as enriched in adult epidermis and muscle and expressed in  
359 neurons by RNA-seq, as well as larval A-type motoneurons by microarray [18,19,41]. For differential  
360 expression analyses between wild type and *acr-2(gf)* neurons, BAM files were loaded into the HTSEQ  
361 program and then analyzed by DESeq2 for differential expression analyses (Table S2) [22,42]. GO-  
362 term enrichment analysis was performed using the GOrilla algorithm for enrichment of Biological  
363 Process terms[24]. Data analyses were performed in Microsoft Excel, R, and Graphpad Prism.  
364 Sequencing datasets have been deposited in the Gene Expression Omnibus (Accession GSE139212).

## 365 **Convulsion and pharmacological analyses**

366 All behavior observations reported here were made on mutations that were outcrossed with N2  
367 for at least 4 times. Convulsions were defined as simultaneous contraction of the body wall muscles  
368 producing a rapid, concerted shortening in body length. The convulsion frequency for day-1 adult  
369 animals was calculated during a 90-second period of observation. For levamisole sensitivity, ten day-1  
370 adult animals were transferred to fresh plates containing 1 mM levamisole. After 1 hr, animals were  
371 assessed for paralysis; if plates contained non-paralyzed animals, then the strain was considered  
372 resistant to levamisole. Sensitivity to 500  $\mu$ M or 1mM aldicarb was assessed by transferring ten day-1  
373 adults to fresh aldicarb plates and by monitoring worms for paralysis every 30 minutes by gently  
374 touching the animal with a platinum wire. Aldicarb sensitivity was quantified for at least three  
375 independent experiments.

## 376 **Imaging and microscopy**

377 Images of fluorescent reporter lines were taken on a Zeiss LSM 700 or 800 confocal microscope  
378 using the 63x objective. Animals were mounted in thick agarose (10%) and rolled with the ventral side  
379 up for consistent imaging. Hyperstacks were processed in ImageJ. (For images in Fig. 4, *Pgcy-33::gfp*  
380 strains, gains were set at 500V for mKate2 and 500V for GFP. For images in Fig. 3, of *juls14* strains,  
381 gains were set at 550V for mKate2 and 600V for GFP.). All images are taken using the 63X objective.  
382 Scoring of *Pins-29::gfp* expression in Figure 4 was performed using a Zeiss Axioplan 2 at the 63X  
383 objective. A neuron was scored as “expressed” if GFP signal was clearly visible in the cell body and  
384 dendrites through the eyepiece.

## 385 **Molecular biology and *C. elegans* transformation**

386 Transcriptional *gfp* reporters were made using Gibson assembly into pPD95.75. Vector was cut  
387 using restriction enzymes and PCR-amplified promoters were inserted. Approximately 2kb upstream of  
388 each neuropeptide gene was used as putative promoter sequence. Primers used for *Pins-29* were  
389 (gene-specific sequence in uppercase): Forward  
390 5'tgcatgcctgcaggctgactCTTTAAAATGGTTAATTTTGTAGTTAG3'/Reverse  
391 5'tggccaatcccgggatcctTTTTTTATTTTACAATATAATATACTTTTATAC3'. Primers used for *Pnlp-1* were:  
392 Forward 5'tgcatgcctgcaggctgactTTGTTTTATCCAACATTATTCAC3'/Reverse  
393 5'tggccaatcccgggatcctCGTTGCCTCAAGTTGATG3'. To generate mKate2 reporters for neuropeptide  
394 expression constructs, GFP sequence in pPD95.75 was replaced with SL2-mKate2 sequence.  
395 Genomic sequences for *flp-12* or *ins-29* was then amplified from genomic DNA and inserted into the  
396 modified pPD95.75 vector using Gibson Assembly. Primers for *ins-29*: Forward  
397 5'aagcttgcctgcaggctgactCTTTAAAATGGTTAATTTTGTAGTTAG3'/Reverse  
398 5'tgaaagtaggatgagacagcTCAAGCAAGATTTGAAGG3'. Primers for *flp-12* were: Forward  
399 5'tgcatgcctgcaggctACAACAAAAGTATTTTTGACG3'/ Reverse  
400 5'agtaggatgagacagcCTACTTTTCGTCCAAATCG3'. These sequences include the entire coding  
401 sequence plus 2kb upstream promoter.



402 cDNAs were generated using the SuperScript RT kit from Invitrogen. 2 $\mu$ g input RNA (from  
403 synchronized young adult *acr-2(gf)* populations) was used for each RT reaction. RNA was extracted  
404 and isolated using Trizol reagent and chloroform extraction. 1 $\mu$ l of RT (~100ng) was used in each PCR  
405 reaction. Nested reactions were used for amplifying both *ins-29* and *ins-25* cDNAs. For *ins-29*, the first  
406 reaction used either SL1 or SL2 forward primer with a gene specific reverse primer: 5'  
407 gcaagattgaaggacagcac 3'. In the second reaction 2 $\mu$ l of the first PCR was used with Primers: Forward  
408 5'TTCTGTAAATTTGTATTCCTGATC, Reverse 5' GATTTGAAGGACAGCACAAT 3'. For *ins-25*, the  
409 first reaction used either SL1 or SL2 forward primers with a gene specific reverse primer :5'  
410 caaattgggcaacacatattc 3'. In the second reaction, 2 $\mu$ l of the first PCR reaction was used with Primers:  
411 Forward 5' ATGTTGTTCAAATCATCATT 3', Reverse 5' GGGCAACACATATTCTTCAG 3'. Product  
412 using the SL2 primer was only detected for *ins-25* transcript and verified by Sanger sequencing.

413 *C. elegans* transgenic multi-copy arrays were generated using standard protocols [See Table  
414 S1 for list of transgenic strains made in this study] [43]. DNA was typically injected at 25ng/ $\mu$ l  
415 concentration. *flp-12* over-expression constructs were injected at 5ng/ $\mu$ l, as injection at 25ng/ $\mu$ l  
416 failed to yield transgenics.

417

## 418 **Acknowledgements**

419 We thank our lab members for helpful discussions, and Matt Andrusiak and Ngang Heok Tang for  
420 comments on the manuscript. We also thank Rachel Kaletsky and Coleen Murphy for sharing advice on  
421 neuron isolation, and Martin Hudson for the XA2260 strain. Some strains were provided by the  
422 Caenorhabditis Genetics Center, which is funded by NIH Office of Research Infrastructure Programs  
423 (P40 OD010440) and the National Bioresource Project of Japan. K.A.M. was a trainee on NIH  
424 institutional training grants (T32 NS007220 and T32 AG000216). This work was supported by a NIH  
425 grant to Y. J. (R37 NS035546).

426

427 **LITERATURE CITED**

- 428 1. Cohen S, Greenberg ME (2008) Communication between the synapse and the nucleus in neuronal  
429 development, plasticity, and disease. *Annu Rev Cell Dev Biol* 24: 183-209.
- 430 2. Cohen S, Gabel HW, Hemberg M, Hutchinson AN, Sadacca LA, et al. (2011) Genome-wide activity-  
431 dependent MeCP2 phosphorylation regulates nervous system development and function.  
432 *Neuron* 72: 72-85.
- 433 3. Zheng F, Zhou X, Moon C, Wang H (2012) Regulation of brain-derived neurotrophic factor  
434 expression in neurons. *Int J Physiol Pathophysiol Pharmacol* 4: 188-200.
- 435 4. Reichmann F, Holzer P (2016) Neuropeptide Y: A stressful review. *Neuropeptides* 55: 99-109.
- 436 5. Kovac S, Walker MC (2013) Neuropeptides in epilepsy. *Neuropeptides* 47: 467-475.
- 437 6. Frazier HN, Ghoweri AO, Anderson KL, Lin RL, Porter NM, et al. (2019) Broadening the definition of  
438 brain insulin resistance in aging and Alzheimer's disease. *Exp Neurol* 313: 79-87.
- 439 7. Jospin M, Qi YB, Stawicki TM, Boulin T, Schuske KR, et al. (2009) A neuronal acetylcholine receptor  
440 regulates the balance of muscle excitation and inhibition in *Caenorhabditis elegans*. *PLoS Biol*  
441 7: e1000265.
- 442 8. Phillips HA, Favre I, Kirkpatrick M, Zuberi SM, Goudie D, et al. (2001) CHRN2 is the second  
443 acetylcholine receptor subunit associated with autosomal dominant nocturnal frontal lobe  
444 epilepsy. *Am J Hum Genet* 68: 225-231.
- 445 9. Li C, Nelson LS, Kim K, Nathoo A, Hart AC (1999) Neuropeptide gene families in the nematode  
446 *Caenorhabditis elegans*. *Ann N Y Acad Sci* 897: 239-252.
- 447 10. Husson SJ, Clynen E, Baggerman G, Janssen T, Schoofs L (2006) Defective processing of  
448 neuropeptide precursors in *Caenorhabditis elegans* lacking proprotein convertase 2 (KPC-  
449 2/EGL-3): mutant analysis by mass spectrometry. *J Neurochem* 98: 1999-2012.
- 450 11. Husson SJ, Janssen T, Baggerman G, Bogert B, Kahn-Kirby AH, et al. (2007) Impaired processing  
451 of FLP and NLP peptides in carboxypeptidase E (EGL-21)-deficient *Caenorhabditis elegans* as  
452 analyzed by mass spectrometry. *J Neurochem* 102: 246-260.

- 453 12. Hung WL, Wang Y, Chitturi J, Zhen M (2014) A *Caenorhabditis elegans* developmental decision  
454 requires insulin signaling-mediated neuron-intestine communication. *Development* 141: 1767-  
455 1779.
- 456 13. Stawicki TM, Takayanagi-Kiya S, Zhou K, Jin Y (2013) Neuropeptides function in a homeostatic  
457 manner to modulate excitation-inhibition imbalance in *C. elegans*. *PLoS Genet* 9: e1003472.
- 458 14. Guillermin ML, Castelletto ML, Hallem EA (2011) Differentiation of carbon dioxide-sensing neurons  
459 in *Caenorhabditis elegans* requires the ETS-5 transcription factor. *Genetics* 189: 1327-1339.
- 460 15. Kaletsky R, Lakhina V, Arey R, Williams A, Landis J, et al. (2016) The *C. elegans* adult neuronal  
461 IIS/FOXO transcriptome reveals adult phenotype regulators. *Nature* 529: 92-96.
- 462 16. Spencer WC, McWhirter R, Miller T, Strasbourger P, Thompson O, et al. (2014) Isolation of specific  
463 neurons from *C. elegans* larvae for gene expression profiling. *PLoS One* 9: e112102.
- 464 17. Zhang S, Banerjee D, Kuhn JR (2011) Isolation and culture of larval cells from *C. elegans*. *PLoS*  
465 *One* 6: e19505.
- 466 18. Kaletsky R, Yao V, Williams A, Runnels AM, Tadych A, et al. (2018) Transcriptome analysis of adult  
467 *Caenorhabditis elegans* cells reveals tissue-specific gene and isoform expression. *PLoS Genet*  
468 14: e1007559.
- 469 19. Von Stetina SE, Watson JD, Fox RM, Olszewski KL, Spencer WC, et al. (2007) Cell-specific  
470 microarray profiling experiments reveal a comprehensive picture of gene expression in the *C.*  
471 *elegans* nervous system. *Genome Biol* 8: R135.
- 472 20. Alfonso A, Grundahl K, Duerr JS, Han HP, Rand JB (1993) The *Caenorhabditis elegans* *unc-17*  
473 gene: a putative vesicular acetylcholine transporter. *Science* 261: 617-619.
- 474 21. Richmond JE, Davis WS, Jorgensen EM (1999) UNC-13 is required for synaptic vesicle fusion in *C.*  
475 *elegans*. *Nat Neurosci* 2: 959-964.
- 476 22. Love MI, Huber W, Anders S (2014) Moderated estimation of fold change and dispersion for RNA-  
477 seq data with DESeq2. *Genome Biol* 15: 550.

- 478 23. Afgan E, Baker D, van den Beek M, Blankenberg D, Bouvier D, et al. (2016) The Galaxy platform  
479 for accessible, reproducible and collaborative biomedical analyses: 2016 update. *Nucleic Acids*  
480 *Res* 44: W3-W10.
- 481 24. Eden E, Navon R, Steinfeld I, Lipson D, Yakhini Z (2009) GOrilla: a tool for discovery and  
482 visualization of enriched GO terms in ranked gene lists. *BMC Bioinformatics* 10: 48.
- 483 25. Liu T, Kim K, Li C, Barr MM (2007) FMRFamide-like neuropeptides and mechanosensory touch  
484 receptor neurons regulate male sexual turning behavior in *Caenorhabditis elegans*. *J Neurosci*  
485 27: 7174-7182.
- 486 26. Chalasani SH, Kato S, Albrecht DR, Nakagawa T, Abbott LF, et al. (2010) Neuropeptide feedback  
487 modifies odor-evoked dynamics in *Caenorhabditis elegans* olfactory neurons. *Nat Neurosci* 13:  
488 615-621.
- 489 27. Nathoo AN, Moeller RA, Westlund BA, Hart AC (2001) Identification of neuropeptide-like protein  
490 gene families in *Caenorhabditiselegans* and other species. *Proc Natl Acad Sci U S A* 98: 14000-  
491 14005.
- 492 28. Kim K, Li C (2004) Expression and regulation of an FMRFamide-related neuropeptide gene family  
493 in *Caenorhabditis elegans*. *J Comp Neurol* 475: 540-550.
- 494 29. Hallem EA, Sternberg PW (2008) Acute carbon dioxide avoidance in *Caenorhabditis elegans*. *Proc*  
495 *Natl Acad Sci U S A* 105: 8038-8043.
- 496 30. Guillermin ML, Carrillo MA, Hallem EA (2017) A Single Set of Interneurons Drives Opposite  
497 Behaviors in *C. elegans*. *Curr Biol* 27: 2630-2639 e2636.
- 498 31. Serrano-Saiz E, Poole RJ, Felton T, Zhang F, De La Cruz ED, et al. (2013) Modular control of  
499 glutamatergic neuronal identity in *C. elegans* by distinct homeodomain proteins. *Cell* 155: 659-  
500 673.
- 501 32. Stawicki TM, Zhou K, Yochem J, Chen L, Jin Y (2011) TRPM channels modulate epileptic-like  
502 convulsions via systemic ion homeostasis. *Curr Biol* 21: 883-888.
- 503 33. Mahoney TR, Luo S, Nonet ML (2006) Analysis of synaptic transmission in *Caenorhabditis elegans*  
504 using an aldicarb-sensitivity assay. *Nat Protoc* 1: 1772-1777.

- 505 34. Lewis JA, Wu CH, Berg H, Levine JH (1980) The genetics of levamisole resistance in the nematode  
506 *Caenorhabditis elegans*. *Genetics* 95: 905-928.
- 507 35. Richmond JE, Jorgensen EM (1999) One GABA and two acetylcholine receptors function at the *C.*  
508 *elegans* neuromuscular junction. *Nat Neurosci* 2: 791-797.
- 509 36. Ringstad N, Horvitz HR (2008) FMRFamide neuropeptides and acetylcholine synergistically inhibit  
510 egg-laying by *C. elegans*. *Nat Neurosci* 11: 1168-1176.
- 511 37. Song Y, Pimentel C, Walters K, Boller L, Ghiasvand S, et al. (2016) Neuroprotective levels of IGF-1  
512 exacerbate epileptogenesis after brain injury. *Sci Rep* 6: 32095.
- 513 38. Paix A, Folkmann A, Rasoloson D, Seydoux G (2015) High Efficiency, Homology-Directed Genome  
514 Editing in *Caenorhabditis elegans* Using CRISPR-Cas9 Ribonucleoprotein Complexes.  
515 *Genetics* 201: 47-54.
- 516 39. Kroetz MB, Zarkower D (2015) Cell-Specific mRNA Profiling of the *Caenorhabditis elegans* Somatic  
517 Gonadal Precursor Cells Identifies Suites of Sex-Biased and Gonad-Enriched Transcripts. *G3*  
518 (Bethesda) 5: 2831-2841.
- 519 40. Trapnell C, Roberts A, Goff L, Pertea G, Kim D, et al. (2012) Differential gene and transcript  
520 expression analysis of RNA-seq experiments with TopHat and Cufflinks. *Nat Protoc* 7: 562-578.
- 521 41. Hulsen T, de Vlieg J, Alkema W (2008) BioVenn - a web application for the comparison and  
522 visualization of biological lists using area-proportional Venn diagrams. *BMC Genomics* 9: 488.
- 523 42. Anders S, Pyl PT, Huber W (2015) HTSeq--a Python framework to work with high-throughput  
524 sequencing data. *Bioinformatics* 31: 166-169.
- 525 43. Evans T (2006) Transformation and microinjection. *WormBook*.

526

527

528

529 **FIGURE LEGENDS**

530 **Figure 1. Differential expression analyses of *acr-2(gf)* neurons compared to wild type**

531 A. Few genes identified as enriched in hypodermis or muscle are detected in isolated adult neurons  
532 labeled by *Pacr-2::gfp*. In contrast, almost all of the genes identified as expressed in cholinergic  
533 neurons labeled by *Pacr-2::gfp* are identified in pan-neuronal data-sets. Shown are Venn Diagrams  
534 with overlaps between the indicated data sets. The number in each region indicates the number of  
535 genes in that category. Hypodermis, muscle, and neuronal datasets are from Kaletsky *et. al.* (2018).  
536 Statistics for significance of overlap were performed using a hypergeometric distribution with the  
537 *phyper* function in R.

538 B. Genes identified in previous expression profiling of larval cholinergic motor neurons, including  
539 core neuronal and cholinergic markers, are identified by RNA-seq of *Pacr-2::gfp* expressing  
540 neurons. The Venn Diagram displays that over half of genes identified by microarray as expressed  
541 in larval A-type motor neurons are also identified by RNA-seq in adult cholinergic neurons that  
542 express *Pacr-2::gfp*. The number in each region indicates the number of genes in that category.  
543 Larval A-type motor neuron expression data is from Von Stetina *et. al.* (2007). Statistics for  
544 significance of overlap were performed using a hypergeometric distribution with the *phyper* function  
545 in R.

546 C. Histogram of  $\log_2$ (Fold Change) for significantly different genes. Most genes that were different in  
547 *acr-2(gf)* compared to wild type were up-regulated at around 2-fold.

548 D. GO-term analyses of genes significantly different in *acr-2(gf)* neurons compared to wild type (see  
549 Materials and Methods). Genes involved in neuropeptide and G-protein signaling (which included  
550 neuropeptide genes) were the most affected.

551

552 **Figure 2. Neuropeptides are up-regulated in head neurons in *acr-2(gf)* animals**

553 A. Log<sub>2</sub>(Fold Change) values for all up-regulated neuropeptides in *acr-2(gf)* animals is shown  
554 organized by class, as identified with DESeq2 analyses. Neuropeptides of each class were  
555 affected. (\*P<0.05, \*\*P<0.01, \*\*\*P<0.001)

556 B-E. Differential expression of neuropeptide transcriptional reporters in the head in *acr-2(gf)*  
557 animals compared to wild type. (B,D)The arrow points to the likely SMB neuron expressing the *flp-*  
558 *12* reporter (*juEx7964*) in wild type based on shape and location. Dashed arrows point to the  
559 bilateral pair ectopically expressing the reporter in *acr-2(gf)*. Dashed lines indicated approximate  
560 outline of the animal. The posterior fluorescent signal in both strains in the co-injection marker  
561 labeling coelomocytes (C,E) *nlp-1::gfp* (*juEx7879*) expression is both increased in the same cells as  
562 wild type and also ectopically expressed. Brackets delineate the anterior and posterior pharyngeal  
563 bulbs, respectively.

564

565 **Figure 3. ILP gene and *acr-2* expression is up-regulated in two head neurons in *acr-2(gf)***

566 A. Shown is the genomic region of *ins-29* and *ins-25* sequences. Insulin-like peptide genes all  
567 contain two exons, each encoding the A and B peptides, respectively. *ok2773* is a 354bp deletion in  
568 *ins-25*. *ju1776* is 568bp deletion in *ins-29*. *ju1580* is a 2.2kb deletion of both *ins-25* and *ins-29*, and  
569 a similar deletion *ju1596* is in *ins-27(ok2474)*, which is ~6kb downstream of *ins-25*. Also shown are  
570 cartoons of the *ins-29* transcription reporters and expression constructs used in this study. SL2  
571 sequence was inserted between *ins-29* and *mKate2* in the expression construct to monitor  
572 expression from the transgene without directly tagging the peptide.

573 B-C. *Pins-29::gfp*(*juEx7742*) is strongly and consistently detected in two neurons in the head of *acr-*  
574 *2(gf)* animals, but often in just one or zero cells in wild type. Occasionally, *Pins-29::gfp* expression  
575 was observed in a third, more posterior neuron in both wild type and *acr-2(gf)*.

576 D-I. A *Pins-29::ins-29::SL2::mKate2* reporter(*juEx7966*) co-localizes with *Pacr-2::gfp*(*juIs14*)  
577 expression in *acr-2(gf)* animals, but not in wild type. scale bar=10μm. Cell bodies expressing

578 mKate2 are labeled by an arrow. (D) In wild type animals, *Pins-29::ins-29::SL2::mKate2(juEx7966)*  
579 is weakly or not expressed in the head. Shown is an animal expressing the transgene in a single  
580 neuron. (E) *Pacr-2::gfp* is expressed in multiple neurons in the head of wild type animals. (F)  
581 Expression of *ins-29* and *acr-2* transcriptional reporters do not overlap in wild type animals,  
582 suggesting that *acr-2* is not normally expressed in the same neurons as *ins-29* in wild type. (G)  
583 Expression of *Pins-29::ins-29::SL2::mKate2* in *acr-2(gf)* is similar to that of *Pins-29::gfp* observed in  
584 (C). (H) Expression of *Pacr-2::gfp* reporter in *acr-2(gf)* animals. (I) Co-localization is observed  
585 between the *ins-29* reporter and *Pacr-2::gfp* in *acr-2(gf)* animals. In all images, animals are rolled to  
586 easily visualize neuron pairs. Beading observed in some images (i.e. the *Pacr-2::gfp*, (E),(H)), is  
587 due to rolling the animals in 10% agarose.

588

589 **Figure 4. *ins-29* is expressed in BAG neurons and is regulated by the *ets-5* transcription**  
590 **factor and motor circuit activity**

591 A-F. A *Pins-29* reporter is expressed in the BAG neurons. Cell bodies expressing indicated  
592 reporters are labeled by an arrow. (A) In wild type animals, expression of *Pins-29::ins-*  
593 *29::SL2::mKate2* in a single neuron in the head is shown. This reporter is often not expressed at all  
594 or in a single neuron in wild type, similar to the transcriptional GFP reporter (B) *Pgcy-33::gfp* labels  
595 BAG gas-sensing neurons in the head. (C) Overlap between the two reporters can be observed in  
596 one neuron. (D) Expression of *Pins-29::ins-29::SL2::mKate2* is observed in two head neurons,  
597 similar to the transcriptional GFP reporter. (E) Expression of *Pgcy-33::gfp* in *acr-2(gf)* is similar to  
598 wild type. (F) Complete overlap is observed between the two reporters. GFP-only signal is from the  
599 co-injection marker. Scale bar=10 $\mu$ m. In all images, animals are rolled to easily visualize neuron  
600 pairs. Beading observed in some images (i.e. the *Pgcy-33::gfp* and *Pmec-4::gfp* in B), is due to  
601 imaging plane of rolling the animals in 10% agarose.

602 G. Almost all *acr-2(gf)* animals express *Pins-29::gfp(juEx7742)* in both BAG neurons, however  
603 mutation of *ets-5* causes animals to exhibit more similar *Pins-29::gfp* expression patterns as wild



604 type. To assay *Pins-29::gfp* expression, animals were scored for detectable GFP in 0, 1, or 2 BAG  
605 neurons. N for each genotype is labeled in the bar.

606 H. Mutation of the TRPM channel *gfl-2*, which almost completely suppresses *acr-2(gf)* convulsion  
607 and locomotion phenotypes, also restores *Pins-29::gfp(juEx7742)* expression to wild-type patterns.  
608 To assay *Pins-29::gfp* expression, animals were scored for detectable GFP in 0, 1, or 2 BAG  
609 neurons. N for each genotype is labeled in the bar.

610

### 611 **Figure 5. Insulin-like peptides and *flp-12* coordinately promote motor circuit activity**

612 A. Convulsion rates for indicated genotypes are shown as convulsions/minute. Deletion of *flp-12* in  
613 combination with either *flp-24(0)* or deletion of the *ins-29 ins-25* region causes a statistically  
614 significant reduction in convulsion rate. (\*P<0.05, \*\*P<0.01, n.s.=non-significant. One-way ANOVA  
615 followed by Dunnett's test. N≥19)

616 B. Over-expression of either *flp-12* or *ins-29* suppresses convulsion. (\*P<0.05, \*\*P<0.01, \*\*\*P<0.001,  
617 n.s.=non-significant. One-way ANOVA followed by Dunnett's test. N≥19)

618 C. Aldicarb sensitivity shown as percentage of animals not paralyzed after 1hour on the drug (Data  
619 from Figure 4A). No significant difference was observed. (Two-way ANOVA followed by Dunnett's  
620 test, compared to *acr-2(gf)* alone.). Data is also shown in Table S3.

621 D. Levamisole Sensitivity of neuropeptide mutants in the *acr-2(gf)* background at 15min (Data from  
622 Figure 4C). Mutation of insulin-like peptides with *flp-12* significantly reduces levamisole sensitivity  
623 compared to *acr-2(gf)* at this timepoint. (\*P<0.05, Two-way ANOVA followed by Dunnett's test  
624 compared to *acr-2(gf)* single mutant.). Data is also shown in Table S5.

625

### 626 **SUPPORTING INFORMATION**

627 **Figure S1. Analysis of insulin-like peptides in the motor circuit**

628 Convulsion rate of *acr-2(gf)* combined with different combinations of deletions in genes for insulin-  
629 like peptides up-regulated in *acr-2(gf)* neurons. None of these combinations had a statistically  
630 significant effect of convulsion rate (One-way ANOVA followed by Dunnett's test).

631 **Table S1. Strains used in this study**

632 **Table S2. Transcriptome analyses of wild type and *acr-2(gf)* neurons**

633 **Table S3. Aldicarb timecourse for neuropeptide mutants with *acr-2(gf)***

634 **Table S4. Aldicarb timecourse for neuropeptide mutants**

635 **Table S5. Levamisole timecourse for neuropeptide mutants with *acr-2(gf)***

636 **Table S6. Levamisole timecourse for neuropeptide mutants**

637 **Table S7. Genotyping primers**

638

639

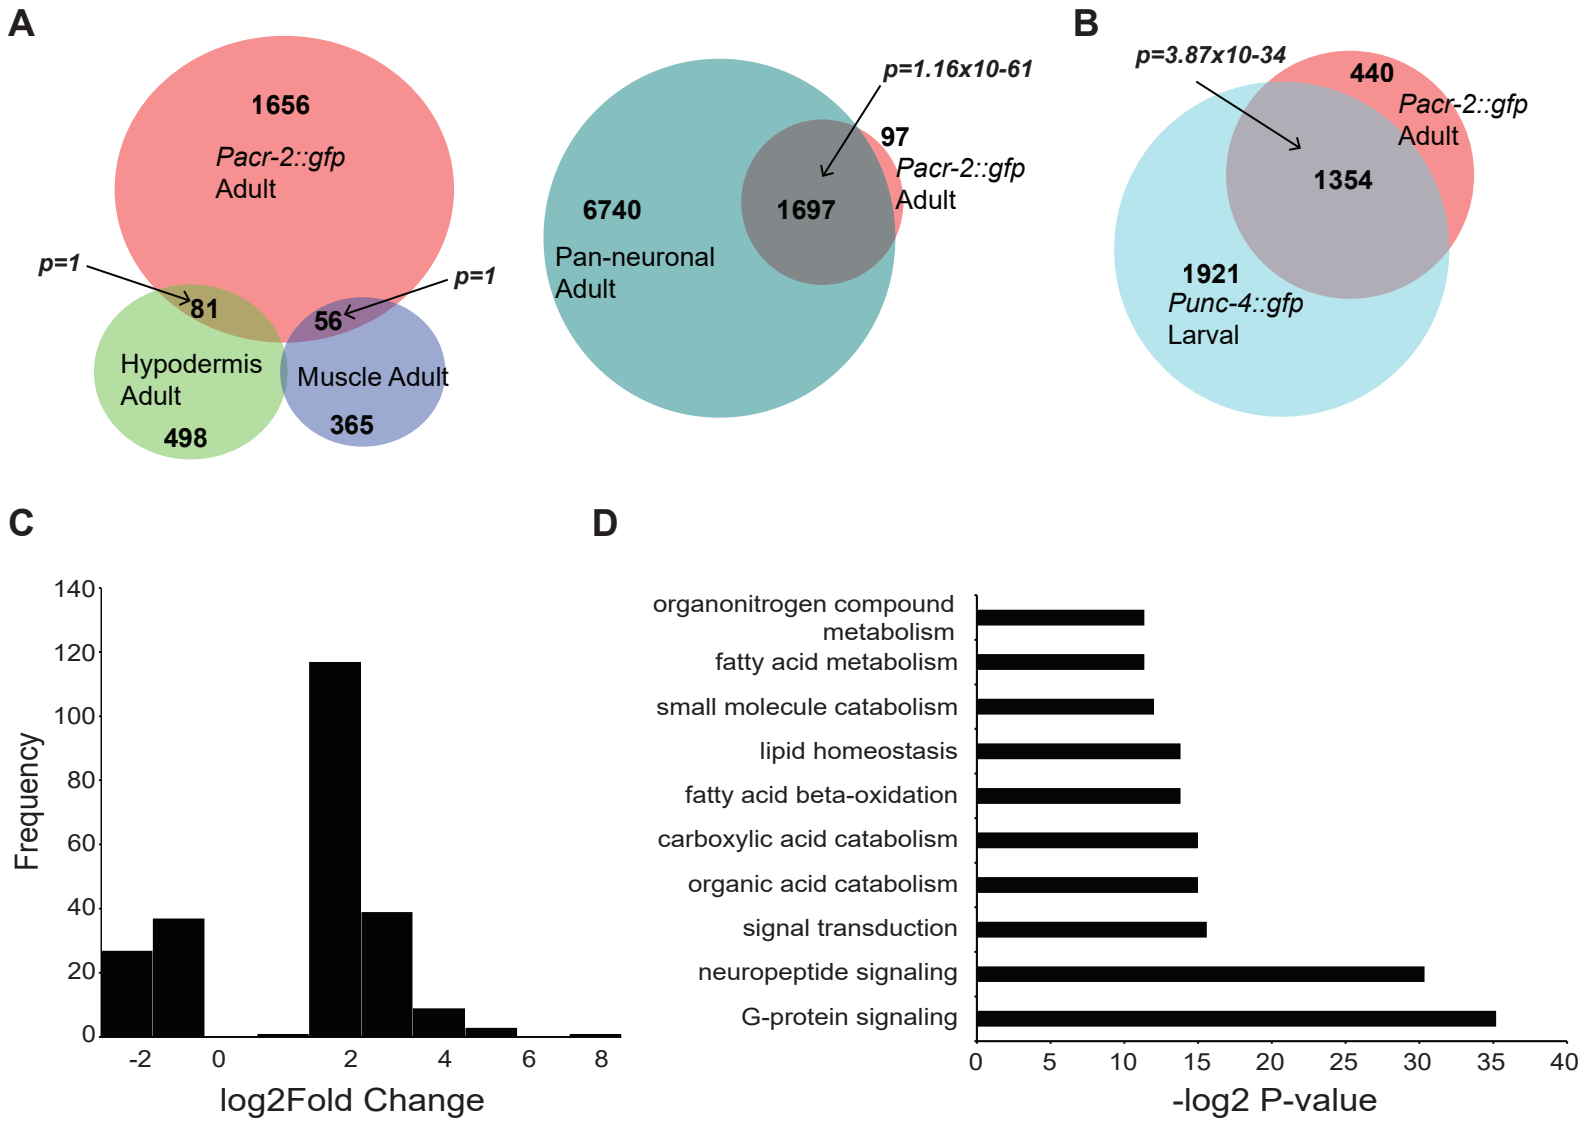

A

McCulloch *et. al.* Figure 2

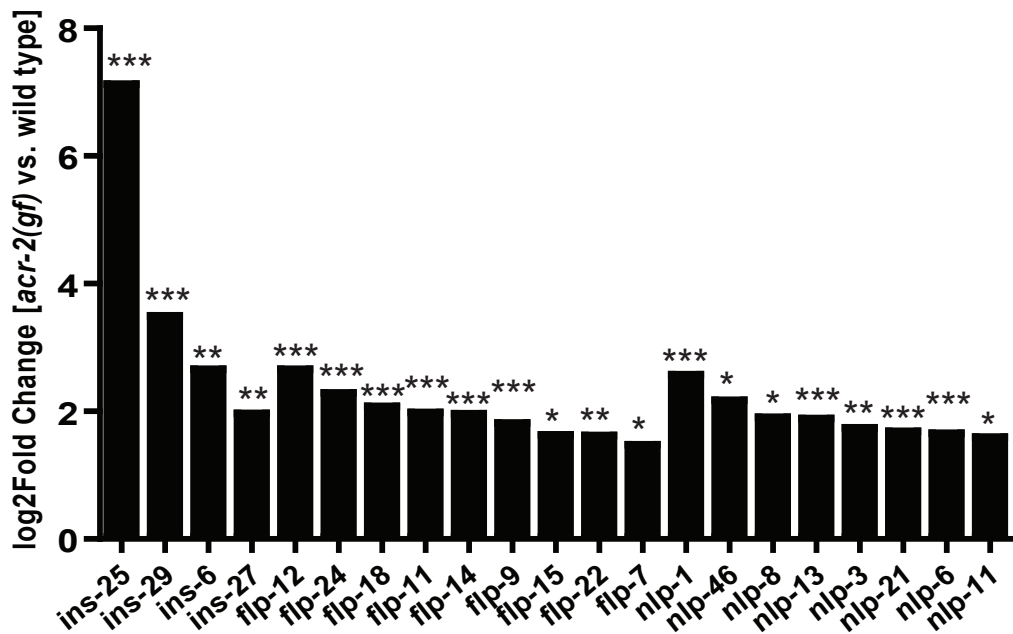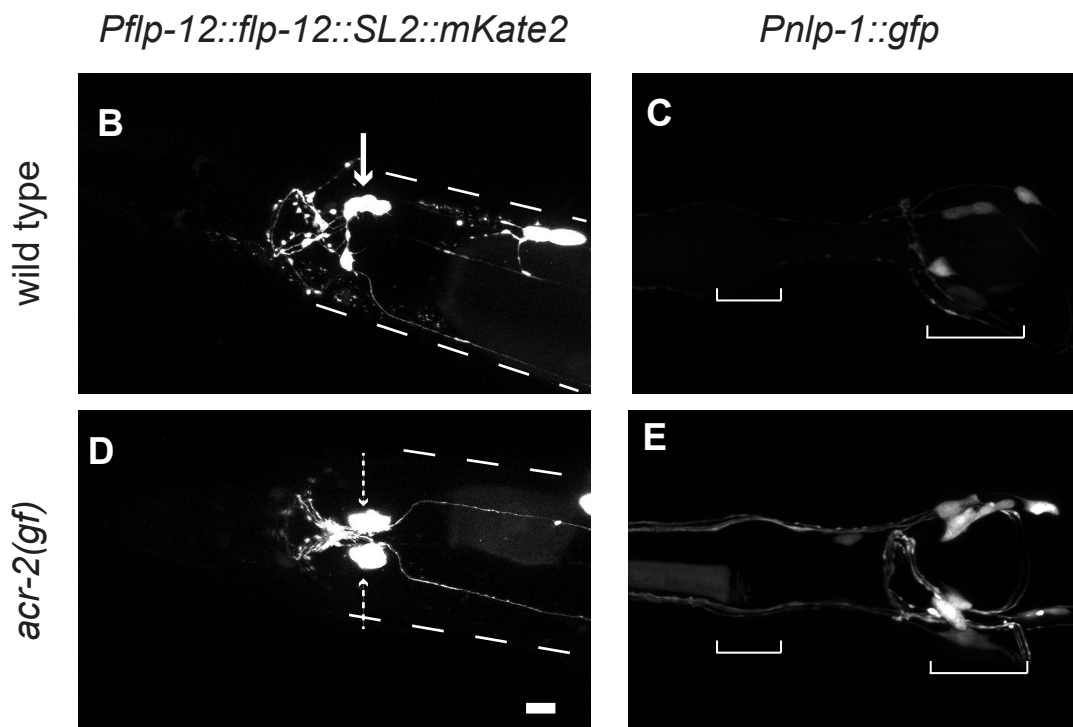

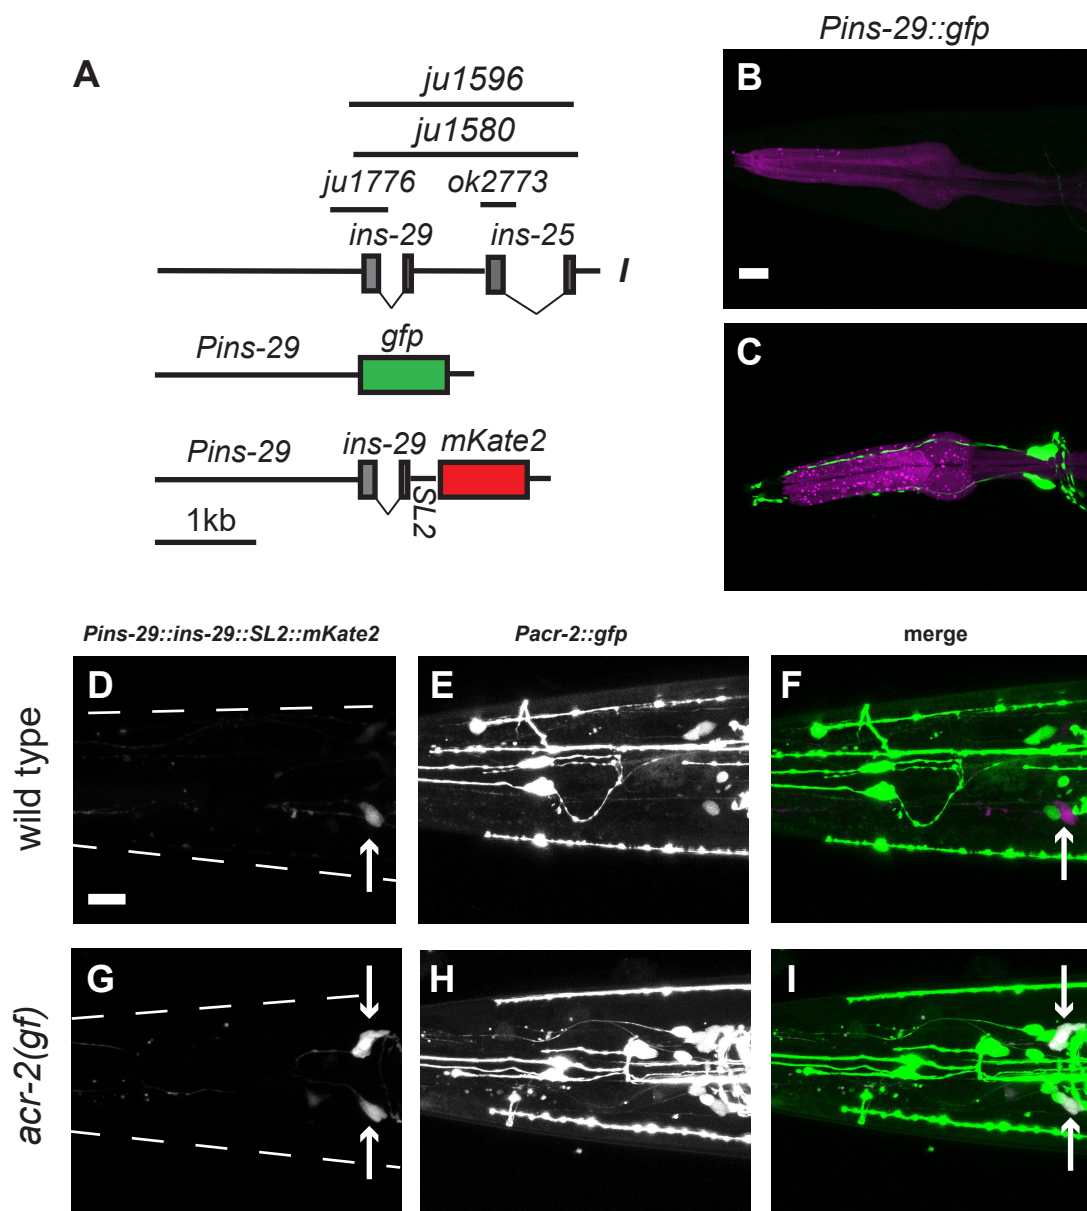

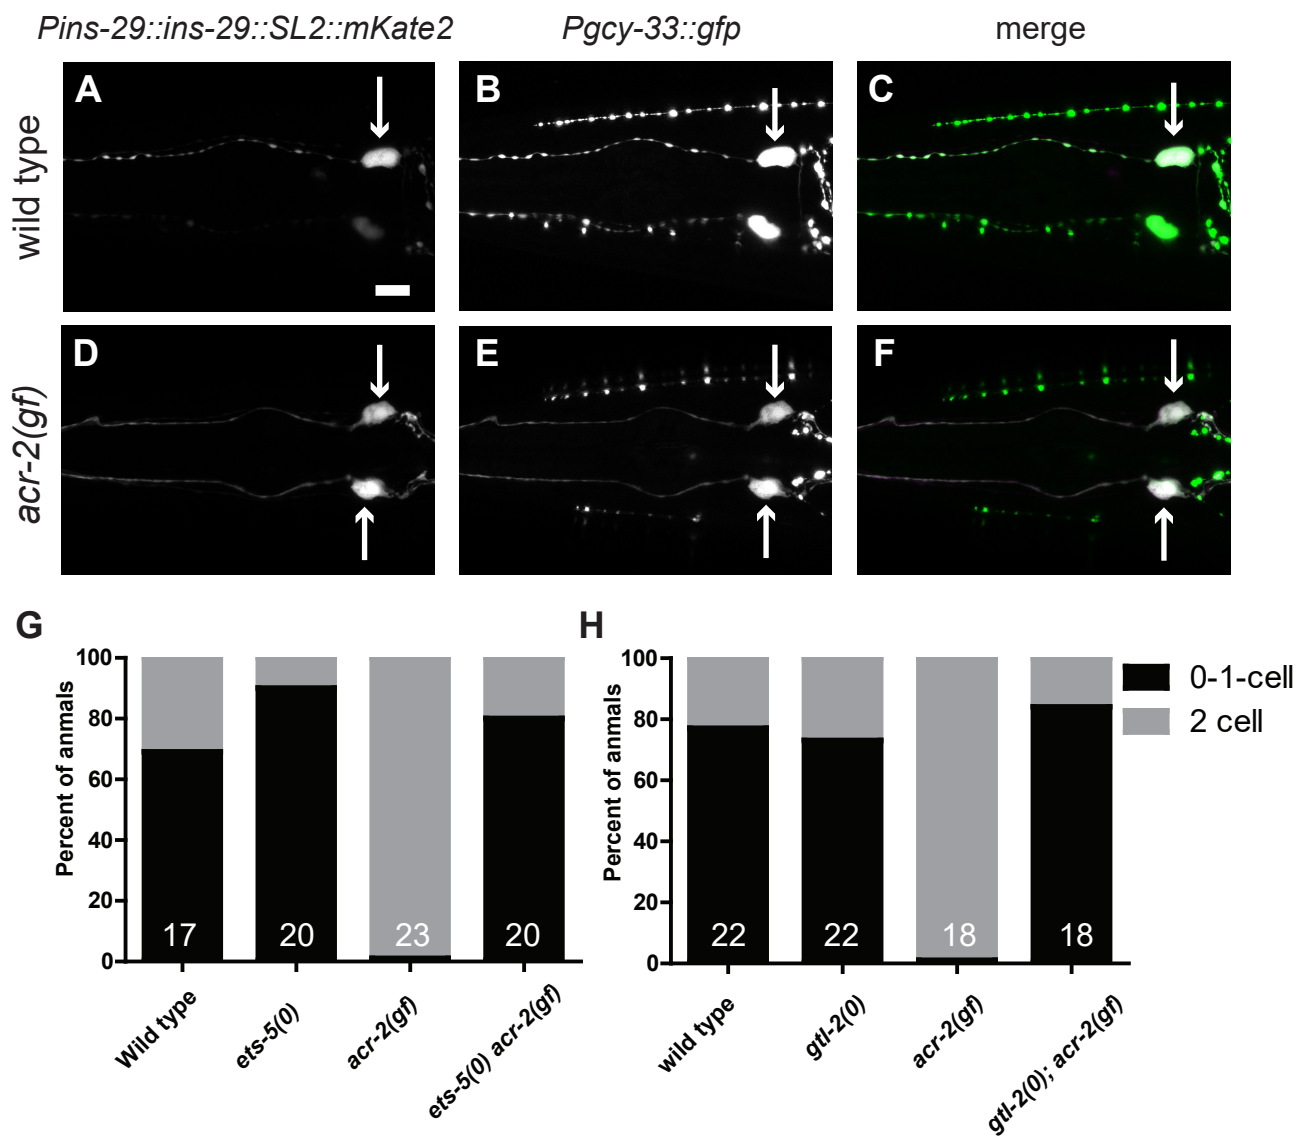

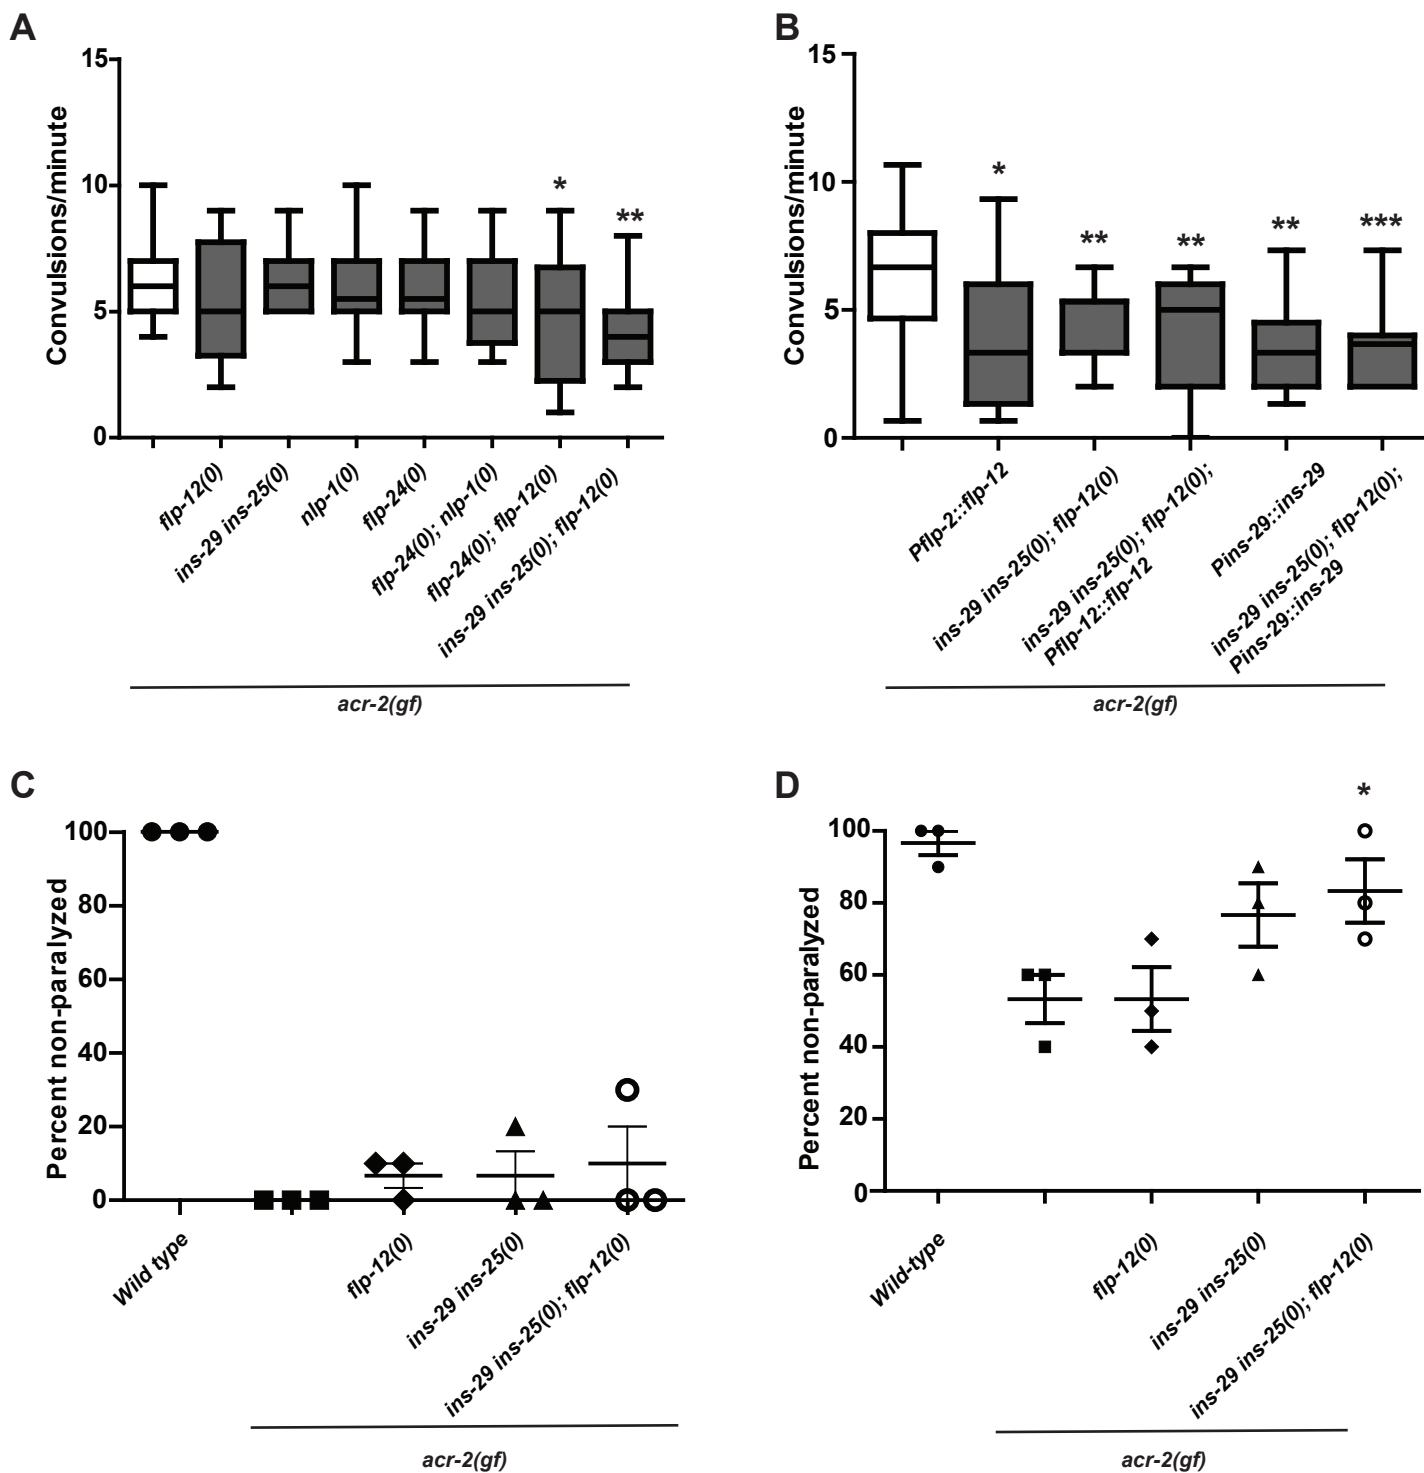

Source: https://www.biorxiv.org/content/10.1101/821769v1.full.pdf
